# Supplementary material
Source: PubMed Central journal article supplement (PMC3901050)
Supplement: NIHMS544569-supplement-01.pdf [file NIHMS544569-supplement-01.pdf]

**Table S1:** Recovery of embryos of various genotypes from timed intercrosses

| Father                                                 | Mother                                                 | Gest. Day | Litter Size | <i>Atf6</i> <sup>+/+</sup> |                           |                           | <i>Atf6</i> <sup>+/-</sup> |                           |                           | <i>Atf6</i> <sup>-/-</sup> |                           |                           |
|--------------------------------------------------------|--------------------------------------------------------|-----------|-------------|----------------------------|---------------------------|---------------------------|----------------------------|---------------------------|---------------------------|----------------------------|---------------------------|---------------------------|
|                                                        |                                                        |           |             | <i>p58</i> <sup>+/+</sup>  | <i>p58</i> <sup>+/-</sup> | <i>p58</i> <sup>-/-</sup> | <i>p58</i> <sup>+/+</sup>  | <i>p58</i> <sup>+/-</sup> | <i>p58</i> <sup>-/-</sup> | <i>p58</i> <sup>+/+</sup>  | <i>p58</i> <sup>+/-</sup> | <i>p58</i> <sup>-/-</sup> |
| <b>E14.5</b>                                           |                                                        |           |             |                            |                           |                           |                            |                           |                           |                            |                           |                           |
| <i>Atf6</i> <sup>+/-</sup> ; <i>p58</i> <sup>-/-</sup> | <i>Atf6</i> <sup>-/-</sup> ; <i>p58</i> <sup>+/-</sup> | 14.5      | 7           |                            |                           |                           |                            | 1                         | 3                         |                            | 3                         |                           |
| <i>expected</i>                                        |                                                        |           |             |                            |                           |                           |                            | 1.75                      | 1.75                      |                            | 1.75                      | 1.75                      |
| <i>Atf6</i> <sup>+/-</sup> ; <i>p58</i> <sup>-/-</sup> | <i>Atf6</i> <sup>-/-</sup> ; <i>p58</i> <sup>+/-</sup> | 14.5      | 2           |                            |                           |                           |                            | 1                         | 1                         |                            |                           |                           |
| <i>expected</i>                                        |                                                        |           |             |                            |                           |                           |                            | 0.5                       | 0.5                       |                            | 0.5                       | 0.5                       |
| <i>Atf6</i> <sup>+/-</sup> ; <i>p58</i> <sup>-/-</sup> | <i>Atf6</i> <sup>-/-</sup> ; <i>p58</i> <sup>+/-</sup> | 14.5      | 8           |                            |                           |                           |                            | 2                         | 2                         |                            | 4                         |                           |
| <i>expected</i>                                        |                                                        |           |             |                            |                           |                           |                            | 2                         | 2                         |                            | 2                         | 2                         |
| <i>Atf6</i> <sup>+/-</sup> ; <i>p58</i> <sup>+/-</sup> | <i>Atf6</i> <sup>+/-</sup> ; <i>p58</i> <sup>+/-</sup> | 14.5      | 10          | 1                          | 1                         | 1                         | 2                          | 1                         | 3                         |                            | 1                         |                           |
| <i>expected</i>                                        |                                                        |           |             | 0.63                       | 1.25                      | 0.63                      | 1.25                       | 2.50                      | 1.25                      | 0.63                       | 1.25                      | 0.63                      |
| <i>Atf6</i> <sup>+/-</sup> ; <i>p58</i> <sup>+/-</sup> | <i>Atf6</i> <sup>+/-</sup> ; <i>p58</i> <sup>+/-</sup> | 14.5      | 9           | 1                          | 3                         |                           |                            | 4                         | 1                         |                            |                           |                           |
| <i>expected</i>                                        |                                                        |           |             | 0.56                       | 1.13                      | 0.56                      | 1.13                       | 2.25                      | 1.13                      | 0.56                       | 1.13                      | 0.56                      |
| <i>Atf6</i> <sup>-/-</sup> ; <i>p58</i> <sup>+/-</sup> | <i>Atf6</i> <sup>+/-</sup> ; <i>p58</i> <sup>+/-</sup> | 14.5      | 7           |                            |                           |                           | 4                          | 2                         | 1                         |                            |                           |                           |
| <i>expected</i>                                        |                                                        |           |             |                            |                           |                           | 0.88                       | 1.75                      | 0.88                      | 0.88                       | 1.75                      | 0.88                      |
| <i>Atf6</i> <sup>+/-</sup> ; <i>p58</i> <sup>+/-</sup> | <i>Atf6</i> <sup>+/-</sup> ; <i>p58</i> <sup>-/-</sup> | 14.5      | 8           |                            | 3                         | 1                         |                            | 4                         |                           |                            |                           |                           |
| <i>expected</i>                                        |                                                        |           |             |                            | 1                         | 1                         |                            | 2                         | 2                         |                            | 1                         | 1                         |
| <b><i>E12.5-14.5 total observed</i></b>                |                                                        |           |             | <b>2</b>                   | <b>7</b>                  | <b>2</b>                  | <b>6</b>                   | <b>15</b>                 | <b>11</b>                 | <b>0</b>                   | <b>8</b>                  | <b>0</b>                  |
| <b><i>E12.5-E14.5 expected</i></b>                     |                                                        |           |             | <b>1.19</b>                | <b>3.38</b>               | <b>2.19</b>               | <b>3.25</b>                | <b>12.75</b>              | <b>9.50</b>               | <b>2.06</b>                | <b>9.38</b>               | <b>7.31</b>               |
| <b>E9.5</b>                                            |                                                        |           |             |                            |                           |                           |                            |                           |                           |                            |                           |                           |
| <i>Atf6</i> <sup>+/-</sup> ; <i>p58</i> <sup>+/-</sup> | <i>Atf6</i> <sup>+/-</sup> ; <i>p58</i> <sup>+/-</sup> | 9.5       | 9           | 1                          | 2                         | 2                         | 1                          |                           |                           | 2                          |                           | 1 <sup>a</sup>            |
| <i>expected</i>                                        |                                                        |           |             | 0.56                       | 1.13                      | 0.56                      | 1.13                       | 2.25                      | 1.13                      | 0.56                       | 1.13                      | 0.56                      |
| <i>Atf6</i> <sup>+/-</sup> ; <i>p58</i> <sup>+/-</sup> | <i>Atf6</i> <sup>+/-</sup> ; <i>p58</i> <sup>+/-</sup> | 9.5       | 7           |                            | 4                         |                           | 1                          | 1                         |                           | 1                          |                           |                           |
| <i>expected</i>                                        |                                                        |           |             | 0.44                       | 0.88                      | 0.44                      | 0.88                       | 1.75                      | 0.88                      | 0.44                       | 0.88                      | 0.44                      |
| <b><i>E9.5 total observed</i></b>                      |                                                        |           |             | <b>1</b>                   | <b>6</b>                  | <b>2</b>                  | <b>2</b>                   | <b>1</b>                  | <b>0</b>                  | <b>3</b>                   | <b>0</b>                  | <b>1</b>                  |
| <b><i>E9.5 expected</i></b>                            |                                                        |           |             | <b>1</b>                   | <b>2</b>                  | <b>1</b>                  | <b>2</b>                   | <b>4</b>                  | <b>2</b>                  | <b>1</b>                   | <b>2</b>                  | <b>1</b>                  |

<sup>a</sup>Recovered double knockout was severely malformed
